# Supplementary material for: Surface CO 2 Gradients Challenge Conventional CO 2 Emission Quantification in Lentic Water Bodies under Calm Conditions
Source: Copernicus journal article supplement (doi:10.5194/egusphere-2024-2550), 2024-08-22
Supplement: Supplementary file 1 [file egusphere-2024-2550-supplement.pdf]

Supplement of

# **Surface CO<sub>2</sub> Gradients Challenge Conventional CO<sub>2</sub> Emission Quantification in Lentic Water Bodies under Calm Conditions.**

Patrick Aurich<sup>1</sup> et al.

5 <sup>1</sup>Department Lake Research, Helmholtz Centre for Environmental Research – UFZ, Brückstraße 3a, 39114 Magdeburg, Germany

*Correspondence to:* Patrick Aurich (patrick.aurich@ufz.de)

## S1. Setup

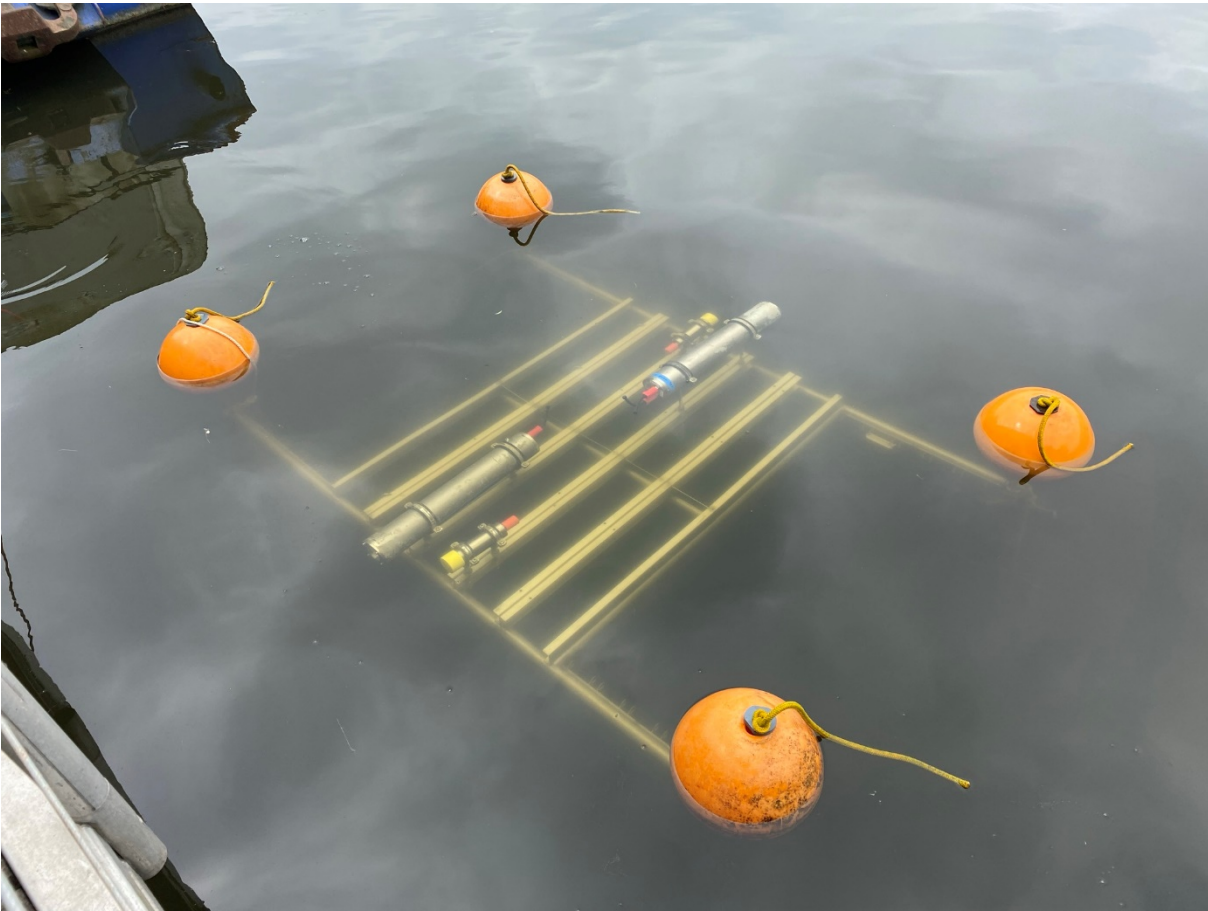

10

**Figure S 1: Photograph of the CO<sub>2</sub> sensors (large metallic probes, Contros HydroC, -4H- JENA engineering, Germany) installed on the floating frame. The mounts of the probes could be extended to adjust the distance between the probes to 20 cm, and the ropes on the buoyancy bodies could be extended to lower the entire frame. By that, the depth of the probes could be adjusted to allow measurements in 5 cm and 25 cm depth.**

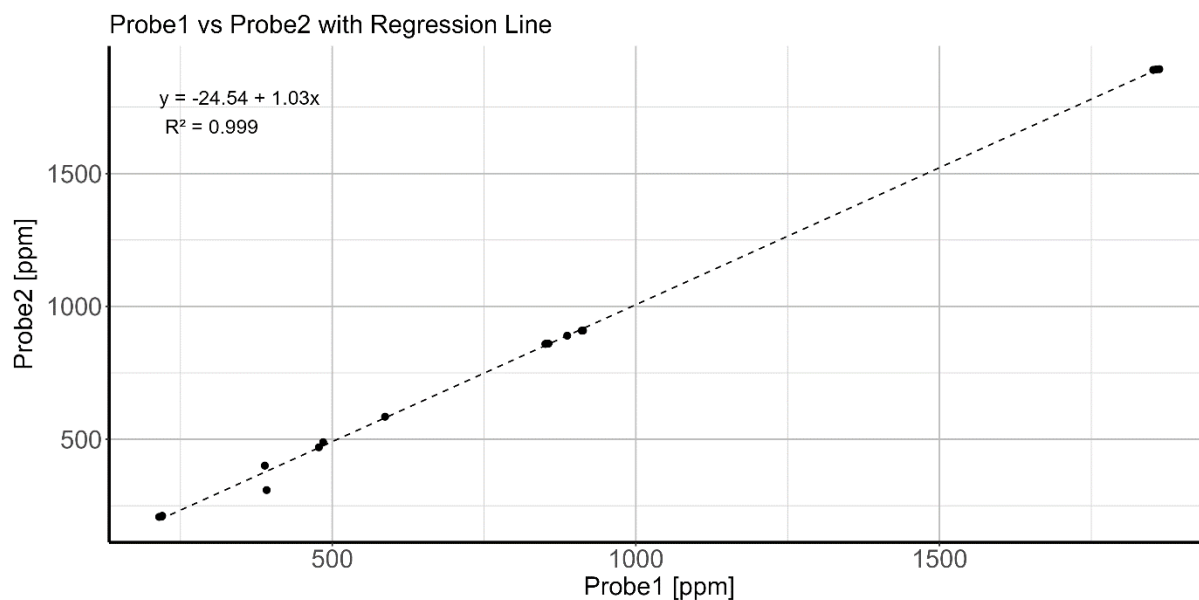

20 **Figure S 2: pCO<sub>2</sub> measurement comparison between the two CO<sub>2</sub> probes. Dots indicate measurements, dashed line is a linear regression. CO<sub>2</sub> Probe calibration was performed in a sink with both probes being deployed at the same time. The probe measurements align well to each other with a correlation coefficient of 0.99. In addition, an infrared gas analyser (EGM-4, PP-Systems, USA) coupled to a membrane contactor (MiniModule, Liqui-Cel, USA) was used as a reference system to quantify probe errors. The mean absolute errors of pCO<sub>2</sub> were 55.4 ppm and 66.2 ppm for Probe1 and Probe2, respectively. Relative errors were -6.14 % and -4.6 % for Probe1 and Probe2, respectively.**
